# Supplementary material
Source: PubMed Central journal article supplement (PMC2781394)

## SUPPLEMENTARY FIGURE LEGENDS

**Supplementary Figure 1. HGF induces SHP mRNA levels in various hepatic cell lines.** A-B, HepG2, AML12 and H4IIE cells were treated with HGF at indicated concentrations or time period and total RNA were isolated for northern hybridization. SHP gene expression was analyzed and normalized to GAPDH gene expression (panel A) or cell lysates from primary rat hepatocytes were prepared after HGF treatment for 15 mins and western blot analysis was performed using phospho-c-Met and c-Met antibodies (panel B). Result is representative of two independently performed experiments. \*P < 0.05 compared to untreated control.

**Supplementary Figure 2. AMPK specifically mediates activation of USF-1 by HGF.** HepG2 cells were transfected with pcDNA3-Flag-USF-1 (400ng), pcDNA3-Flag-USF-2 (400ng), E-box-Luc (200ng). 24 h post serum starvation, cells were pretreated with compound C (10  $\mu$ M) for 1 h preceding HGF (50 ng/ml) treatment. Experiments were done in triplicate, and data are expressed in relative luciferase units (RLU) and as the fold activation relative to the control, representing mean  $\pm$  SD of 3 individual experiments.

# Supplementary Figure 1

A

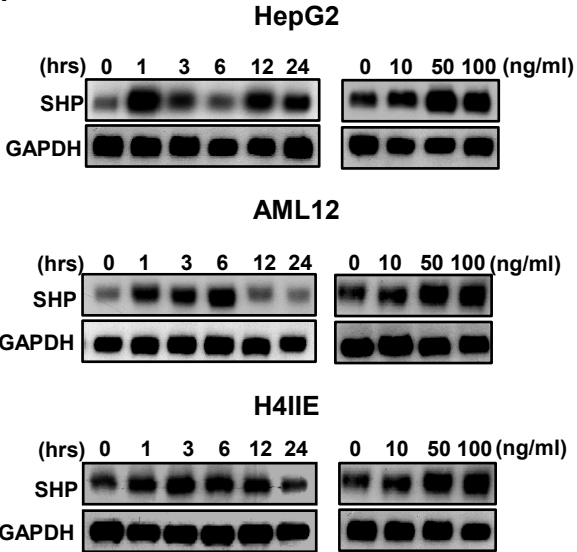

B

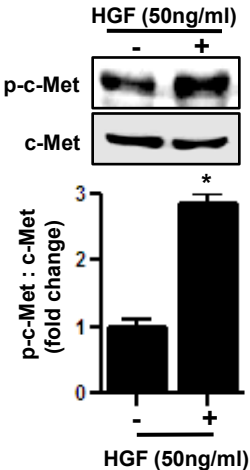

## Supplementary Figure 2

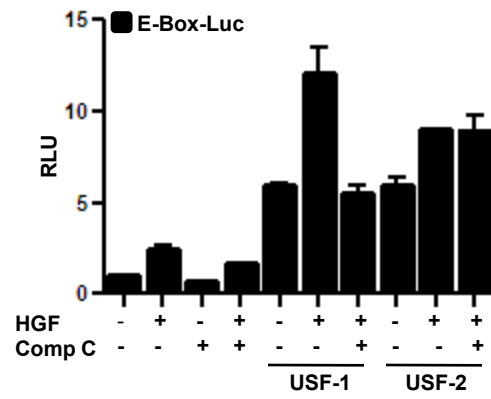

Supplement: supp_M109.022244_jbc.M109.022244-1.pdf [file supp_M109.022244_jbc.M109.022244-1.pdf]
